# Supplementary material
Source: publisher figshare collection journal article supplement (https://tandf.figshare.com/ndownloader/files/22563107)
Supplement: Supplementary file 1 [file 22563107]

## Supplementary Information

### Inhibition of UDP-glucuronosyltransferases by common furoquinoline alkaloids

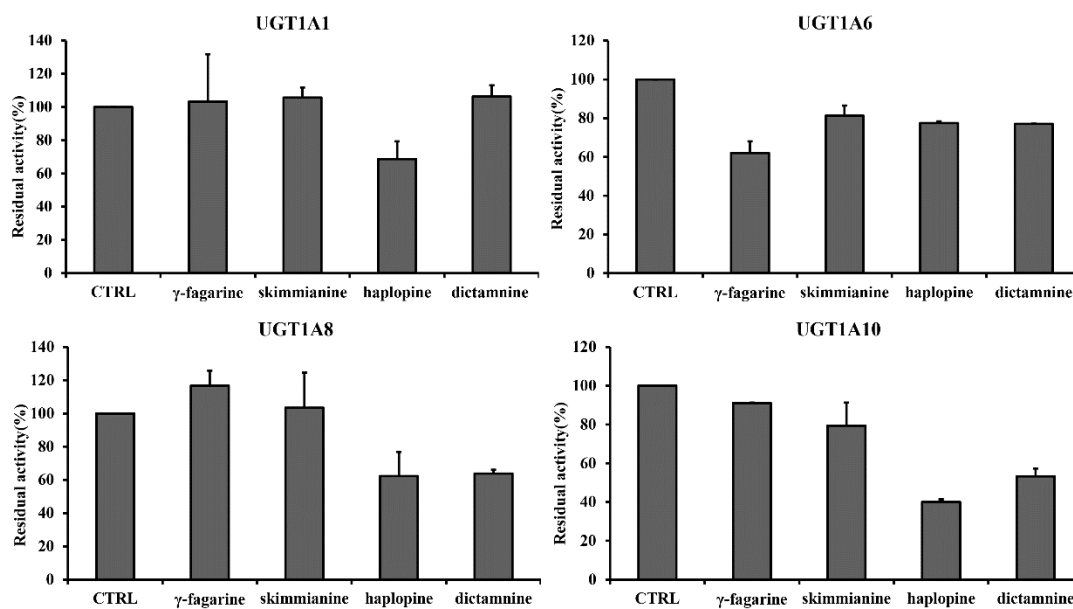

**Figure S1:** Inhibition screening of dictamnine, haplopine,  $\gamma$ -fagarine and skimmianine on the activity of UGT1A1, UGT1A6, UGT1A8 and UGT1A10. Data are presented as the mean value plus standard deviation (S.D., n=2). All residual activity values are at least >20%.

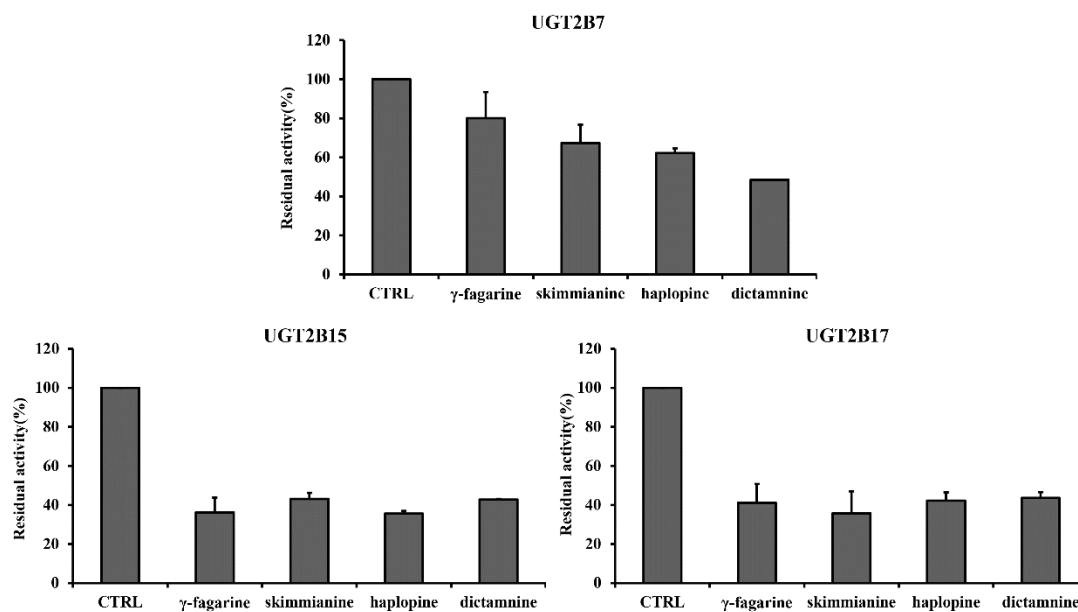

**Figure S2:** Inhibition screening of dictamnine, haplopine,  $\gamma$ -fagarine and skimmianine on the activity of UGT2B7, UGT2B15 and UGT2B17. Data are presented as the mean value plus standard deviation (S.D., n=2). All residual activity values are at least >20%.

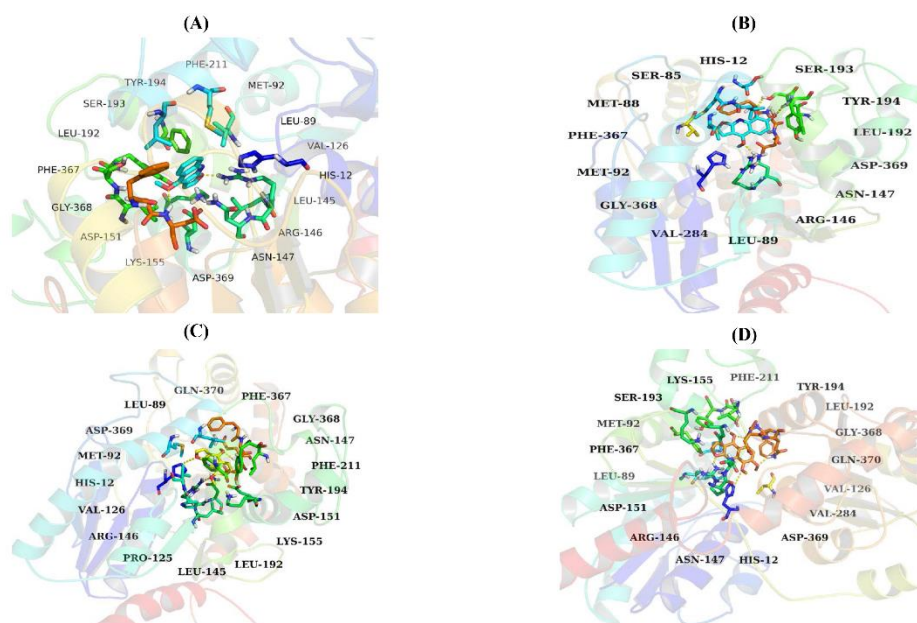

**Figure S3:** Description of docking status between the four furoquinoline alkaloids and activity of UGT1A3. The active site of UGT1A3 binding with (A) dictamnine, (B) haplopine, (C)  $\gamma$ -fagarine and (D) skimmianine, respectively.

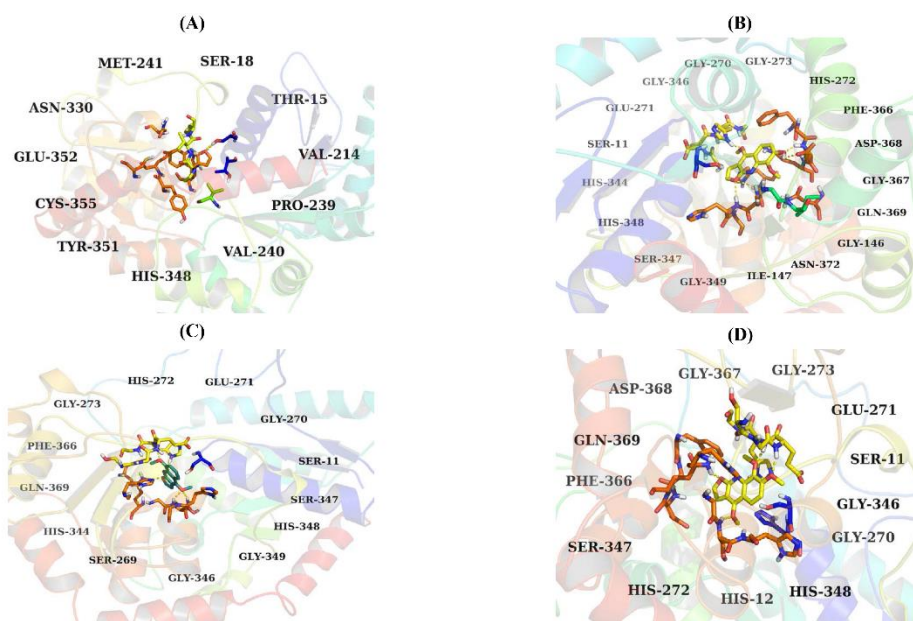

**Figure S4:** Description of docking status between the four furoquinoline alkaloids and activity of UGT1A7. The active sites of UGT1A7 binding with (A) dictamnine, (B) haplopine, (C)  $\gamma$ -fagarine and (D) skimmianine, respectively.

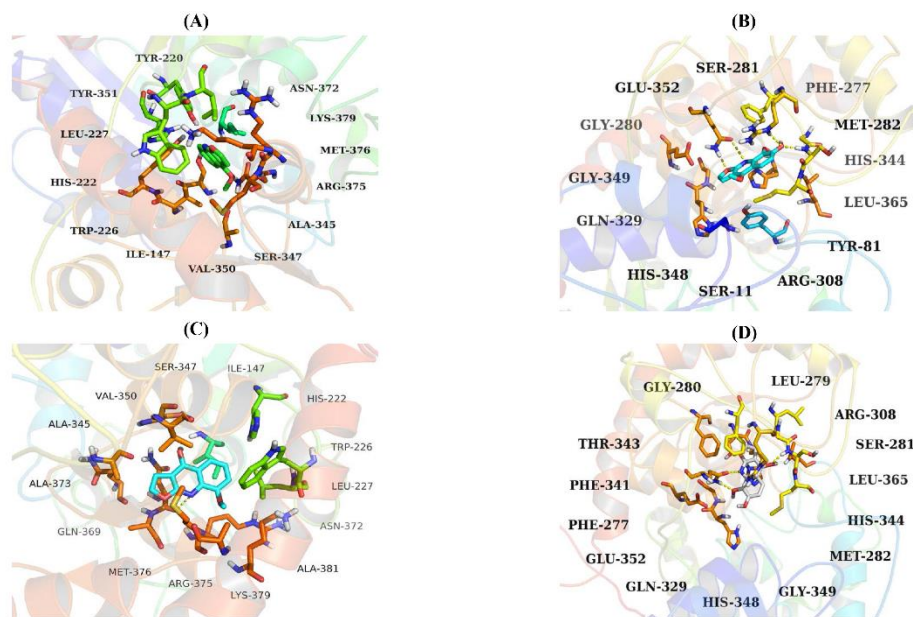

**Figure S5:** Description of docking status between the four furoquinoline alkaloids and activity of UGT1A9. The active sites of UGT1A9 binding with (A) dictamnine, (B) haplopine, (C)  $\gamma$ -fagarine and (D) skimmianine, respectively.
